# Supplementary material for: Selective separation of lactic, malic, and tartaric acids based on the hydrophobic deep eutectic solvents of terpenes and amides
Source: Royal Society of Chemistry journal article supplement (doi:10.1039/d1gc01088c), 2021-01-01
Supplement: d1gc01088c1.pdf [file d1gc01088c1.pdf]

Electronic Supplementary Material (ESI) for Green Chemistry

Electronic supplementary information

## **Selective Separation of Lactic, Malic, and Tartaric acids Based on Hydrophobic Deep Eutectic Solvents of Terpenes and Amides**

Lijuan Liu,<sup>a, b</sup> Benlong Su,<sup>c</sup> Qifeng Wei,<sup>a, b, \*</sup> and Xiulian Ren<sup>a, b, \*</sup>

<sup>a</sup> School of Chemistry and Chemical Engineering, Harbin Institute of Technology, Harbin 150001, China, E-mail: [renxiulian@126.com](mailto:renxiulian@126.com) , [weiqifeng163@163.com](mailto:weiqifeng163@163.com)

<sup>b</sup> School of Marine Science and Technology, Harbin Institute of Technology at Weihai, Weihai Wenhua West Road 2, Weihai, Shandong 264209, China.

<sup>c</sup> Center for Rubber Composite Materials and Structures, Harbin Institute of Technology, Weihai, Shandong 264209, China, E-mail: [subenlong@hit.edu.cn](mailto:subenlong@hit.edu.cn)

### **Content:**

Number of pages: **8**

Number of figures: **11**

Number of tables: **7**

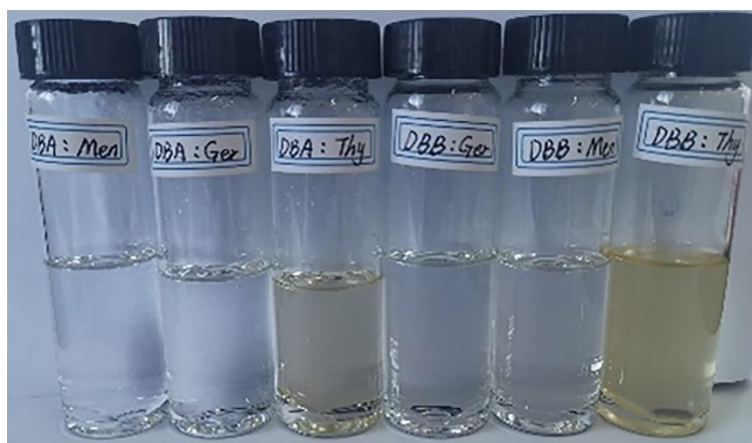

Figure S1 Appearance of synthetic hydrophobic DESs of different compositions in this work at ambient temperature.

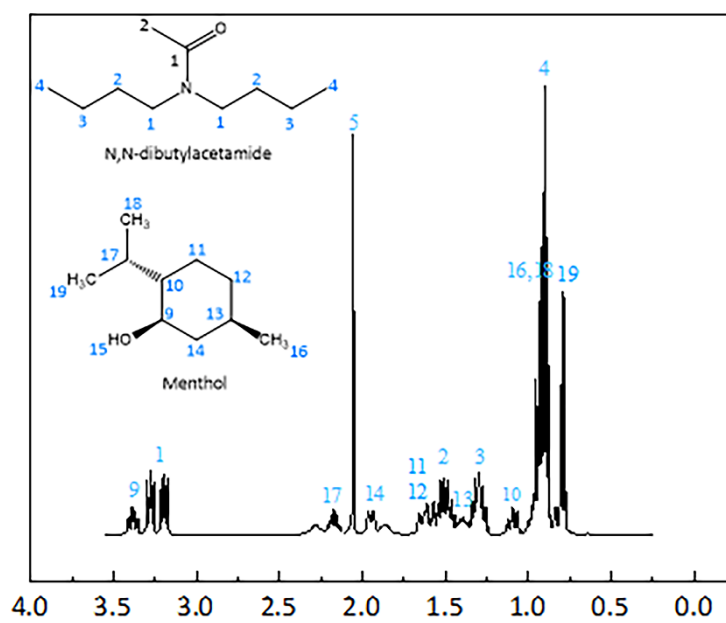

Figure S2 <sup>1</sup>H NMR spectra of deep eutectic solvent DBA : Men 1:1 in CDCl<sub>3</sub>. The structure and numbering of both compounds is also depicted.

Electronic Supplementary Material (ESI) for Green Chemistry

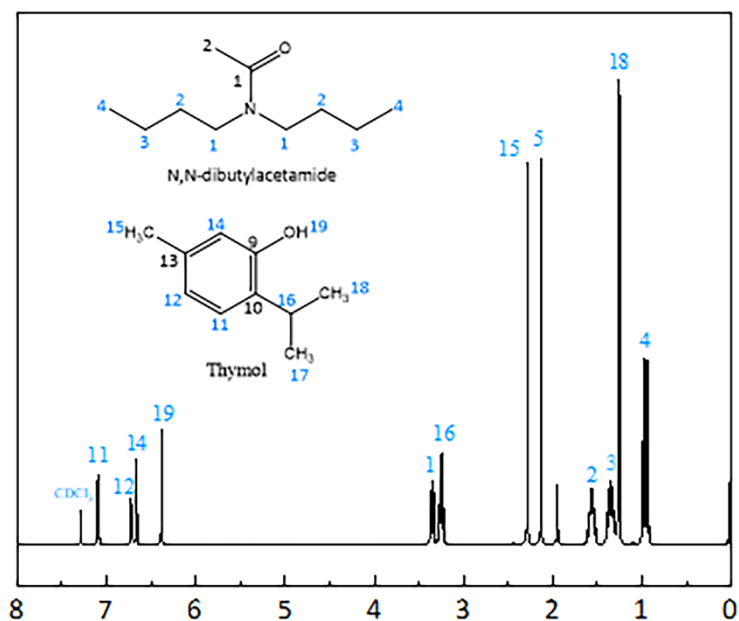

Figure S3  $^1\text{H}$  NMR spectra of deep eutectic solvent DBA : Thy 1:1 in  $\text{CDCl}_3$ . The structure and numbering of both compounds is also depicted.

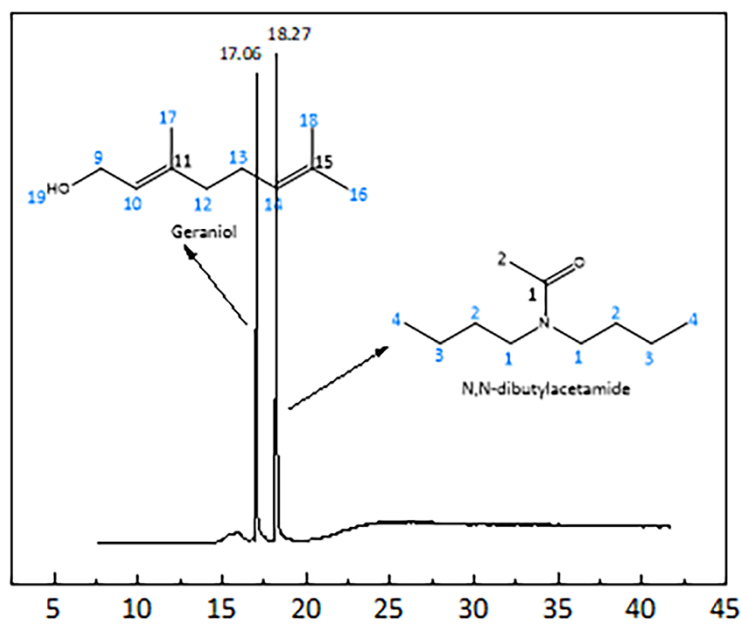

Figure S4 The total ions chromatogram of deep eutectic solvent DBA : Ger 1:1 in  $\text{CH}_3\text{CH}_2\text{OH}$

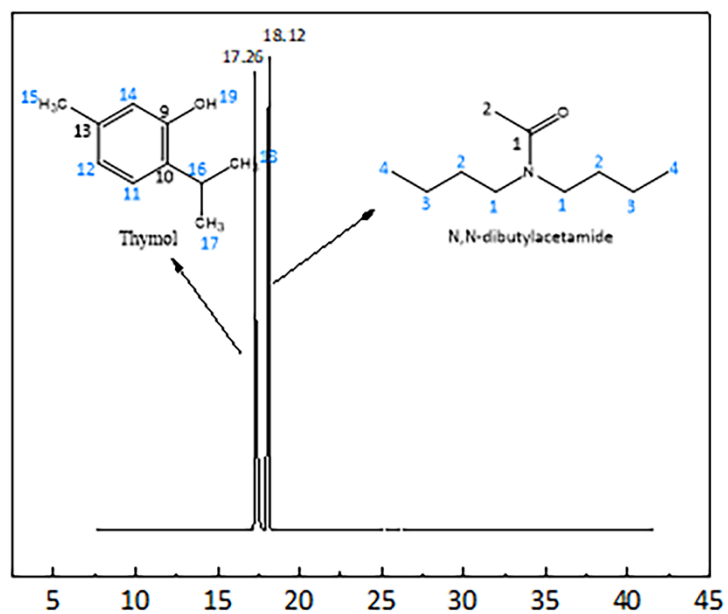

Figure S5 The total ions chromatogram of deep eutectic solvent DBA : Thy 1:1 in  $\text{CH}_3\text{CH}_2\text{OH}$

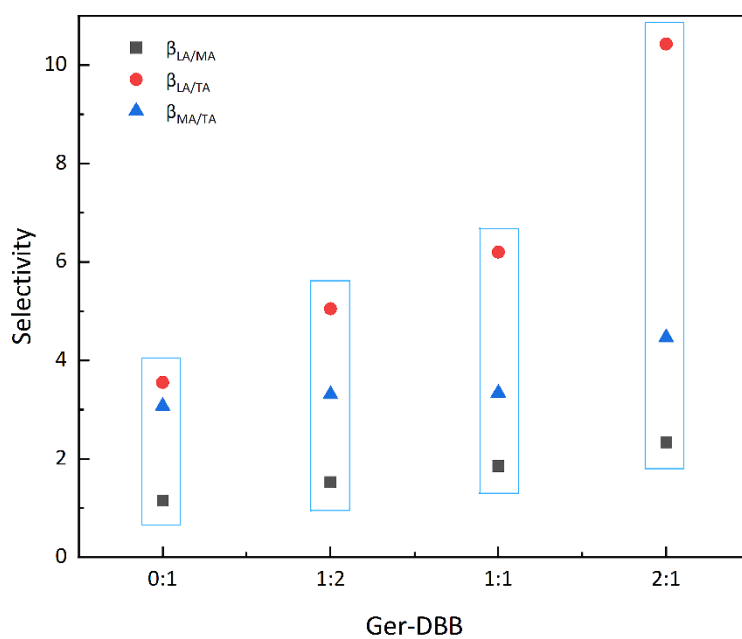

Figure S6 Selectivity ( $\beta$ ) in various DES/water systems for , malic acid, tartaric acid, DES/water volume ratio was 1, Ger-DBB at different mole ratio.

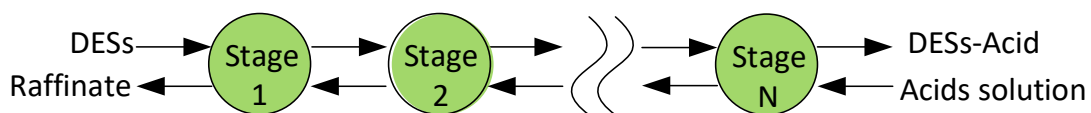

Figure S7 Countercurrent extraction flow chart

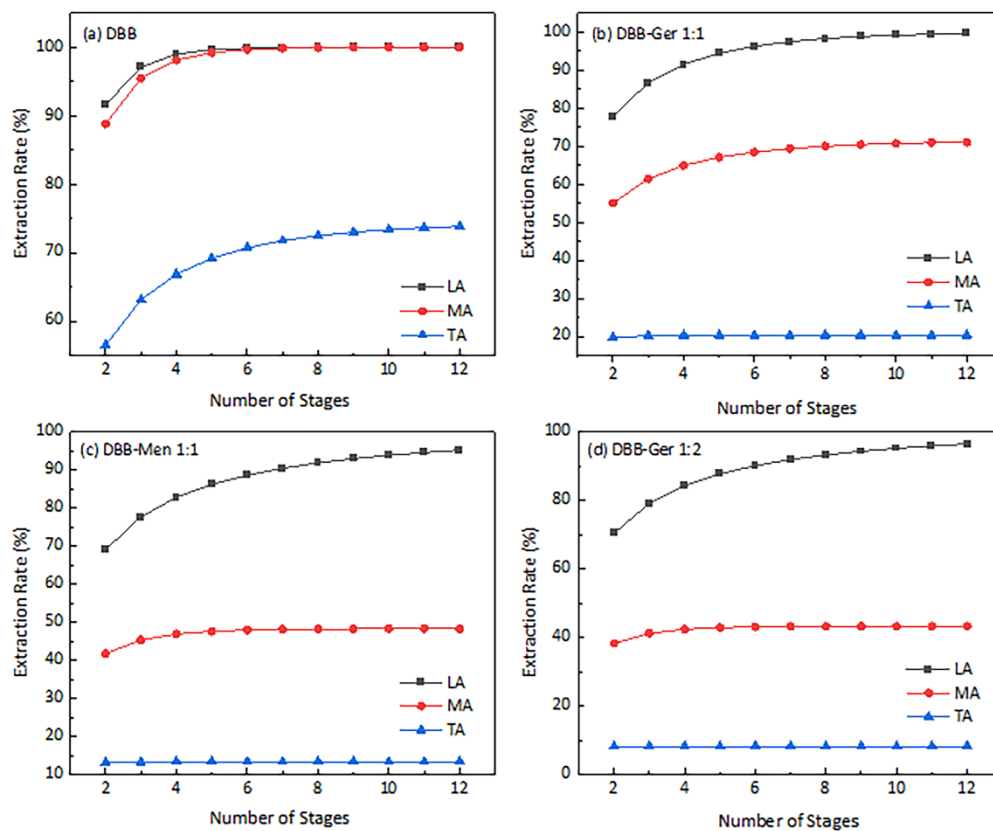

Figure S8 Extraction yields in the selective separation of LA, MA, and TA in the simulation of the counter-current extractor with the Kremser method V/L ratio in volume of 1.0. (a) DBB; (b) DBB-Ger mole ratio of 1:1; (c) DBB-Men mole ratio of 1:1; (d) DBB-Ger mole ratio of 1:2

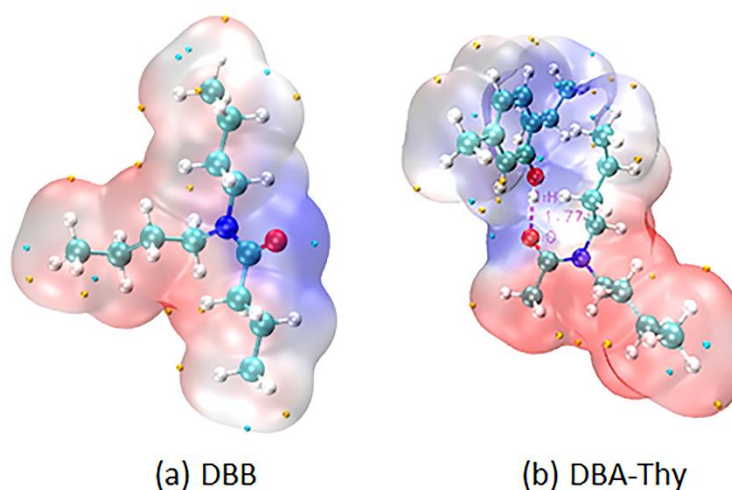

Figure S9 DESS (DBA-Thy) electrostatic potential values mapped on van der Waals surface. Minima and maxima of the ESP on the vdW surface are drawn as cyan and orange, respectively. (negative regions are indicated in blue, and positive regions are indicated in red).

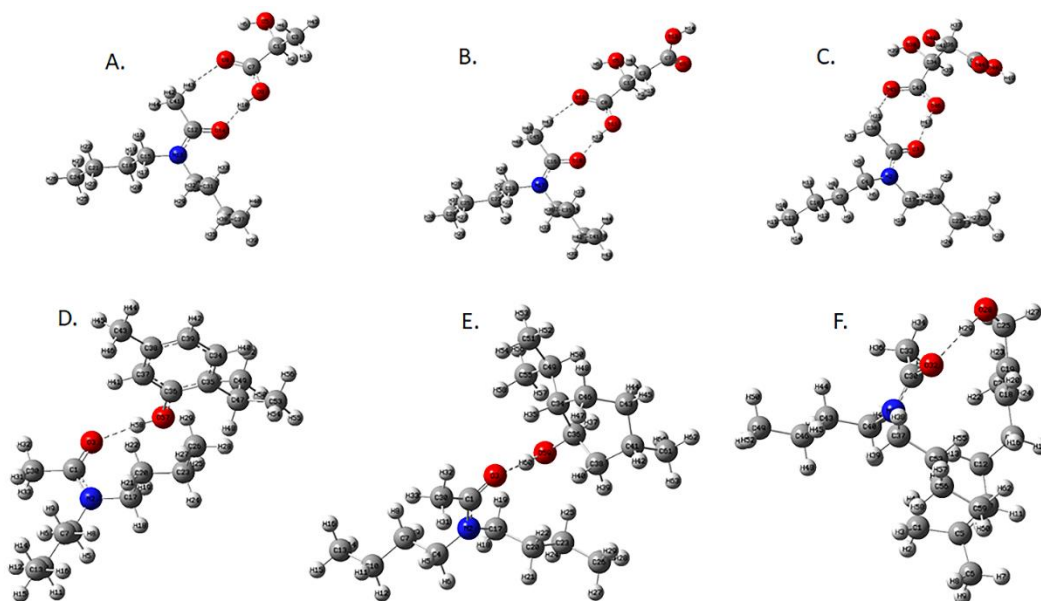

Figure S10 Models of complexes interaction sites optimized at B3LYP/6-31++G(d, p) level.

A.DBA-LA; B. DBA-MA; C. DBA-TA; D. DBA-Ger; E. DBA-Men; F. DBA-Thy.

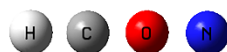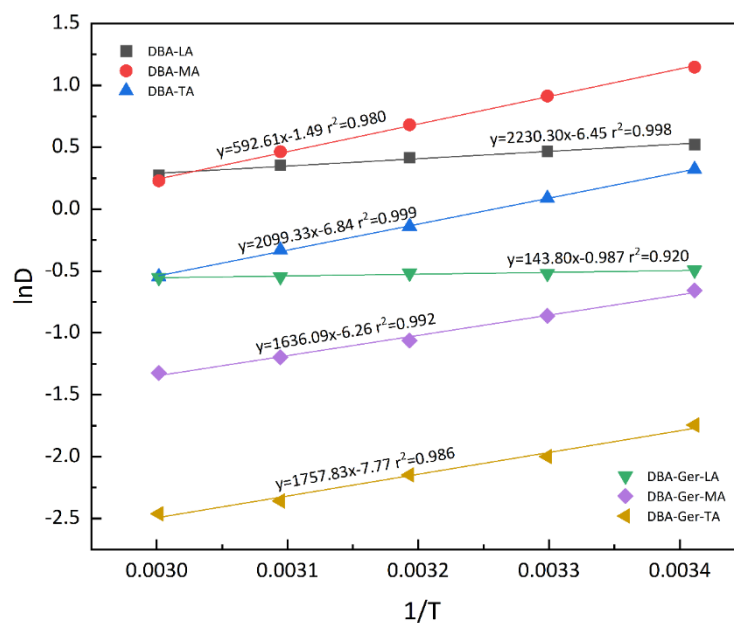

Figure S11 the relationship between lnD and 1/T

## Electronic Supplementary Material (ESI) for Green Chemistry

Table S1 Chemical structures of the DESs studied in this work as well as the abbreviation and respective molar mass

| Chemical                   | Molecular formula                  | Abbreviation | M      | BHBAs structure                                                                     |
|----------------------------|------------------------------------|--------------|--------|-------------------------------------------------------------------------------------|
| N, N-Di-n-butyl-acetamide  | C <sub>10</sub> H <sub>21</sub> NO | DBA          | 171    | 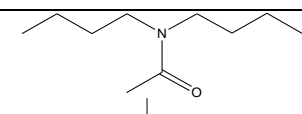 |
| N, N-Di-n-butyl-butyramide | C <sub>12</sub> H <sub>25</sub> NO | DBB          | 199    |  |
| geraniol                   | C <sub>10</sub> H <sub>18</sub> O  | Ger          | 154.14 |  |
| menthol                    | C <sub>10</sub> H <sub>20</sub> O  | Men          | 156.27 |  |
| thymol                     | C <sub>10</sub> H <sub>14</sub> O  | Thy          | 150.22 |  |

Table S2 Equilibrium distribution coefficients (D) in various DES/water systems for lactic acid (LA), malic acid (MA), tartaric acid (TA), DES/water volume ratio was 1, HBA-HBD mole ratio of 1:1.

|         | D <sub>(LA)</sub> | D <sub>(MA)</sub> | D <sub>(TA)</sub> |
|---------|-------------------|-------------------|-------------------|
| DBA-Ger | 0.55898           | 0.40378           | 0.14472           |
| DBA-Men | 0.45263           | 0.30825           | 0.10014           |
| DBA-Thy | 0.07406           | 0.01934           | 0.00572           |
| DBB-Ger | 0.35028           | 0.17301           | 0.04977           |
| DBB-Men | 0.26916           | 0.12071           | 0.03331           |
| DBB-Thy | 0.04356           | 0.00616           | 6.32511E-4        |

Table S3 Equilibrium distribution coefficients (D) in various DES/water systems for lactic acid (LA), malic acid (MA), tartaric acid (TA) at different mole ratio of DBA-Ger, DES/water volume ratio was 1.

| DBA-GER | D <sub>(LA)</sub> | D <sub>(MA)</sub> | D <sub>(TA)</sub> |
|---------|-------------------|-------------------|-------------------|
| 0:1     | 1.67831           | 2.48933           | 1.07478           |
| 1:2     | 0.8629            | 0.82785           | 0.31438           |
| 1:1     | 0.58299           | 0.41626           | 0.12146           |
| 2:1     | 0.38392           | 0.20225           | 0.04237           |
| 1:0     | 0.1683            | 0.02399           | -0.01804          |

Table S4 Equilibrium distribution coefficients (D) in various DES/water systems for lactic acid (LA), malic acid (MA), tartaric acid (TA) at different mole ratio of DBB-Ger, DES/water volume ratio was 1.

| DBB-GER | D <sub>(LA)</sub> | D <sub>(MA)</sub> | D <sub>(TA)</sub> |
|---------|-------------------|-------------------|-------------------|
| 0:1     | 0.70836           | 0.5896            | 0.18601           |
| 1:2     | 0.45659           | 0.27709           | 0.0763            |
| 1:1     | 0.35968           | 0.17857           | 0.05076           |
| 2:1     | 0.28087           | 0.10813           | 0.02049           |
| 1:0     | 0.16702           | 0.02932           | -0.00932          |

Table S5 Selectivity ( $\beta$ ) in various DES/water systems for lactic acid, malic acid, tartaric acid, DES/water volume ratio was 1, DBA-HBD mole ratio of 1:1.

|         | $\beta_{LA/MA}$ | $\beta_{LA/TA}$ | $\beta_{MA/TA}$ |
|---------|-----------------|-----------------|-----------------|
| DBA     | 0.62183         | 1.37689         | 2.21425         |
| DBA-Ger | 1.38436         | 3.86253         | 2.79012         |
| DBA-Men | 1.46839         | 4.51997         | 3.07818         |
| DBA-Thy | 3.82958         | 12.94391        | 3.37998         |

Table S6 Selectivity ( $\beta$ ) in various DES/water systems for lactic acid, malic acid, tartaric acid, at different mole ratio of DBA-Ger, DES/water volume ratio was 1.

| DBA | $\beta_{LA/MA}$ | $\beta_{LA/TA}$ | $\beta_{MA/TA}$ |
|-----|-----------------|-----------------|-----------------|
| 0:1 | 0.62183         | 1.37689         | 2.21425         |
| 1:2 | 0.94558         | 2.35302         | 2.48845         |
| 1:1 | 1.25919         | 3.51306         | 2.78993         |
| 2:1 | 1.69128         | 5.19903         | 3.07401         |

Table S7 Selectivity ( $\beta$ ) in various DES/water systems for lactic acid, malic acid, tartaric acid, at different mole ratio of DBB-Ger, DES/water volume ratio was 1.

| DBB | $\beta_{LA/MA}$ | $\beta_{LA/TA}$ | $\beta_{MA/TA}$ |
|-----|-----------------|-----------------|-----------------|
| 0:1 | 1.15533         | 3.55503         | 3.07706         |
| 1:2 | 1.52498         | 5.0498          | 3.31139         |
| 1:1 | 1.85627         | 6.20304         | 3.34166         |
| 2:1 | 2.33388         | 10.42894        | 4.4685          |
